# Supplementary material for: Chemical Sensing Properties of BaF2-Modified hBN Flakes towards Detection of Volatile Organic Compounds
Source: MDPI journal article supplement (doi:10.3390/chemosensors9090263), 2021-09-13
Supplement: s1 [file s1]

# Chemical Sensing Properties of BaF<sub>2</sub>-Modified *h*BN Flakes towards Detection of Volatile Organic Compounds

Boitumelo J. Matsoso <sup>1,2</sup>, Clara Garcia-Martinez <sup>3</sup>, Thomas H. Mongwe <sup>4,5</sup>, Bérangère Toury <sup>1</sup>, José P. M. Serbena <sup>3,\*</sup> and Catherine Journet <sup>1,\*</sup>

<sup>1</sup> Laboratoire des Multimatériaux et Interfaces, UMR CNRS 5615, Univ-Lyon, Université Claude Bernard Lyon 1, CEDEX, F-69622 Villeurbanne, France; boijo.matsoso@gmail.com (B.J.M.); berangere.toury-pierre@univ-lyon1.fr (B.T.)

<sup>2</sup> Department of Inorganic Chemistry, University of Chemistry and Technology Prague, Technická 5, Dejvice, Prague, 166 28, Czech Republic; matsosoj@vscht.cz

<sup>3</sup> Centro Politécnico, Departamento de Física, Universidade Federal do Paraná, Caixa Postal 19.44, Curitiba, PR, Brazil; claraigarcia2@hotmail.com

<sup>4</sup> DSI-NRF Centre of Excellence in Strong Materials and <sup>5</sup>Molecular Science Institute, School of Chemistry, University of the Witwatersrand, Johannesburg, 2050, South Africa; nyathithomas@gmail.com (T.H.M.)

\* Correspondence: serbena@fisica.ufpr.br (J.P.M.S.); catherine.journet@univ-lyon1.fr (C.J.)

## 1. Material Synthesis and Sensor Preparation

The hexagonal boron nitride (*h*BN) nanosheets were synthesized based on the reported procedure, whereby borazine was used as a source for boron and nitrogen atoms, lithium nitride (Li<sub>3</sub>N, 99.4 %, Alfa Aesar) as a crystallization agent and barium fluoride (BaF<sub>2</sub>, 99%, Alfa Aesar), as a melting-point reduction agent. Typically, 5wt. % Li<sub>3</sub>N and 0 – 10 wt.% BaF<sub>2</sub> [1] were added a colourless liquid polyborazylene (PBN) [2], followed by homogenization of the suspension via stirring for 10 min. The suspension was subjected to heat treatment at 200 °C in an alumina crucible for 1h, and the solid-state polymer was the annealed for 1h at 1200 °C (1 °C/min) under inert nitrogen (N<sub>2</sub>, 98%, Air Liquide, France) atmosphere [3]. Finally, the chemical vapour sensing properties of the *h*BN samples were evaluated by screening their as-fabricated devices against the polar aprotic (acetone) and polar protic (ethanol) analytes. For device fabrication, dispersions of 2 mg/mL of the *h*BN samples with 4 mg/mL of CTAB were sonicated for 30 min at 60 °C, and then stored at 0 °C to facilitate precipitation of hydrated crystals from the excess surfactant [4]. Thereafter, ~100 µL of the *h*BN dispersions were drop casted onto an FR4 substrate containing interdigitated electrodes (ENIG-Electroless Nickel Immersion Gold, Micropress S.A.; active area ~ 64 mm<sup>2</sup>) and dried in an oven at 100 °C for 30 min [5].

## 2. Results and Discussion

Concentrations of acetone and ethanol vapours (C) were determined from the amount of acetone and ethanol, added to the analysis chamber through the equation:

$$C_{ppm} = \frac{2.46vd}{VsMw} 10^7 \dots\dots\dots(S1)$$

where v represents the volume (in µL) added to the chamber (in our case 1µL, 2 µL, 3 µL, 4 µL and 5 µL, which correspond to the vapor concentrations). Vs is the volume (in mL) of the analysis chamber (here: 2400 mL), d is the density of analyte (in g/mL-1) and Mw is the molecular weight of analyte in gM-1. Measurements were taken after 10 min, allowing that the analysis chamber reach steady-state conditions. Sensor response was obtained by resistance measurements, which were carried out using an Agilent 4284A LCR, with an AC signal amplitude of 1 V under dry nitrogen atmosphere.

The sensing performance of the *h*BN-based devices was determined based on the limit of detection (*LoD*) and the sensitivity (*S*), given by

$$LoD = Rb + 3db \dots\dots\dots (S2)$$

**Citation:** Matsoso, B.J.; Garcia-Martinez, C.; Mongwe, T.H.; Toury, B.; Serbena, J.P.M.; Journet, C. Chemical Sensing Properties of BaF<sub>2</sub>-Modified *h*BN Flakes towards Detection of Volatile Organic Compounds. *Chemosensors* **2021**, *9*, 263. <https://doi.org/10.3390/chemosensors9090263>

Academic Editor: Vardan Galstyan

Received: 29 June 2021

Accepted: 10 September 2021

Published: date

**Publisher's Note:** MDPI stays neutral with regard to jurisdictional claims in published maps and institutional affiliations.

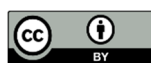

**Copyright:** © 2021 by the authors. Submitted for possible open access publication under the terms and conditions of the Creative Commons Attribution (CC BY) license (<https://creativecommons.org/licenses/by/4.0/>).

$$S = dResp/dC \dots \dots \dots (S3)$$

where,  $R_b$  is the average resistance,  $db$  is the standard deviation of the device resistance without analyte, and  $C$  is an analyte concentration. Furthermore, the relative variation of the resistance ( $R$ ) was used, based on equation S3, was used to determine the response ( $Resp$ ) of the sensing devices;

$$\Delta R/R_0 = (R_f - R_0)/R_0 \dots \dots \dots (S4)$$

where  $R_f$  is the resistance of the sensor when exposed to analyte and  $R_0$  the resistance of the sensor under an inert atmosphere of dry  $N_2$ .

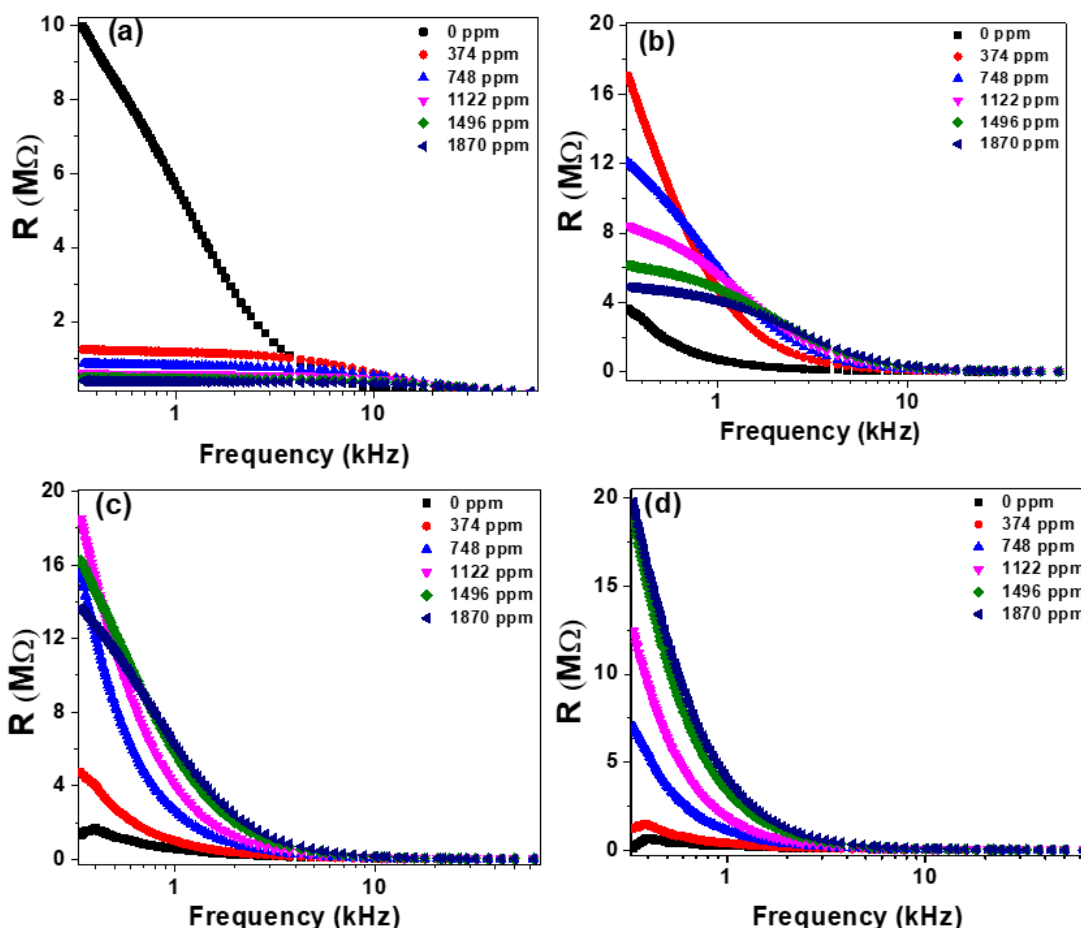

**Figure S1.** Dependence of sensor resistance on frequency with increasing EtOH: Acetone concentrations for (a) 0, (b) 2.5, (c) 5, and (d) 10 wt% BaF<sub>2</sub>- modified hBN based sensors.

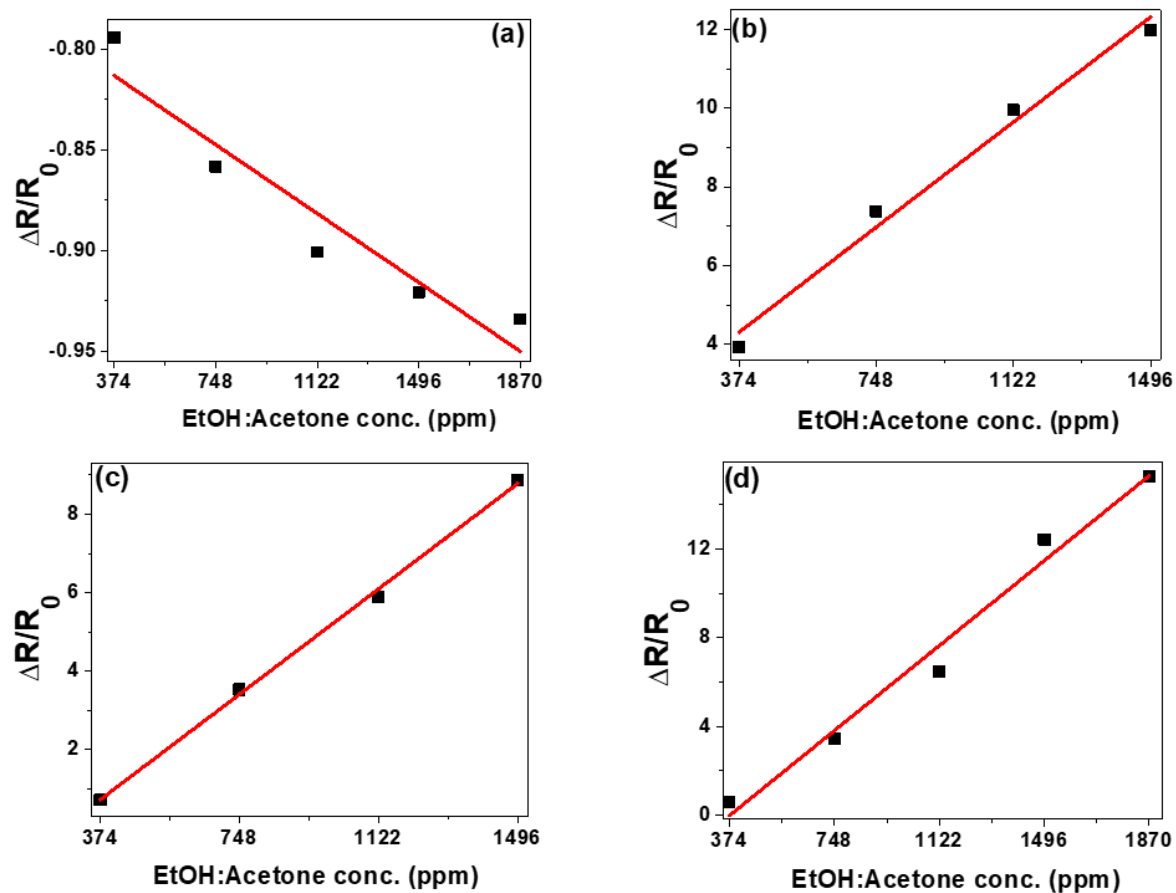

**Figure S2.** Sensor response versus EtOH: acetone concentrations (a) 0, (b) 2.5, (c) 5, and (d) 10 wt% BaF<sub>2</sub>- modified hBN based sensors at optimum operating frequencies.

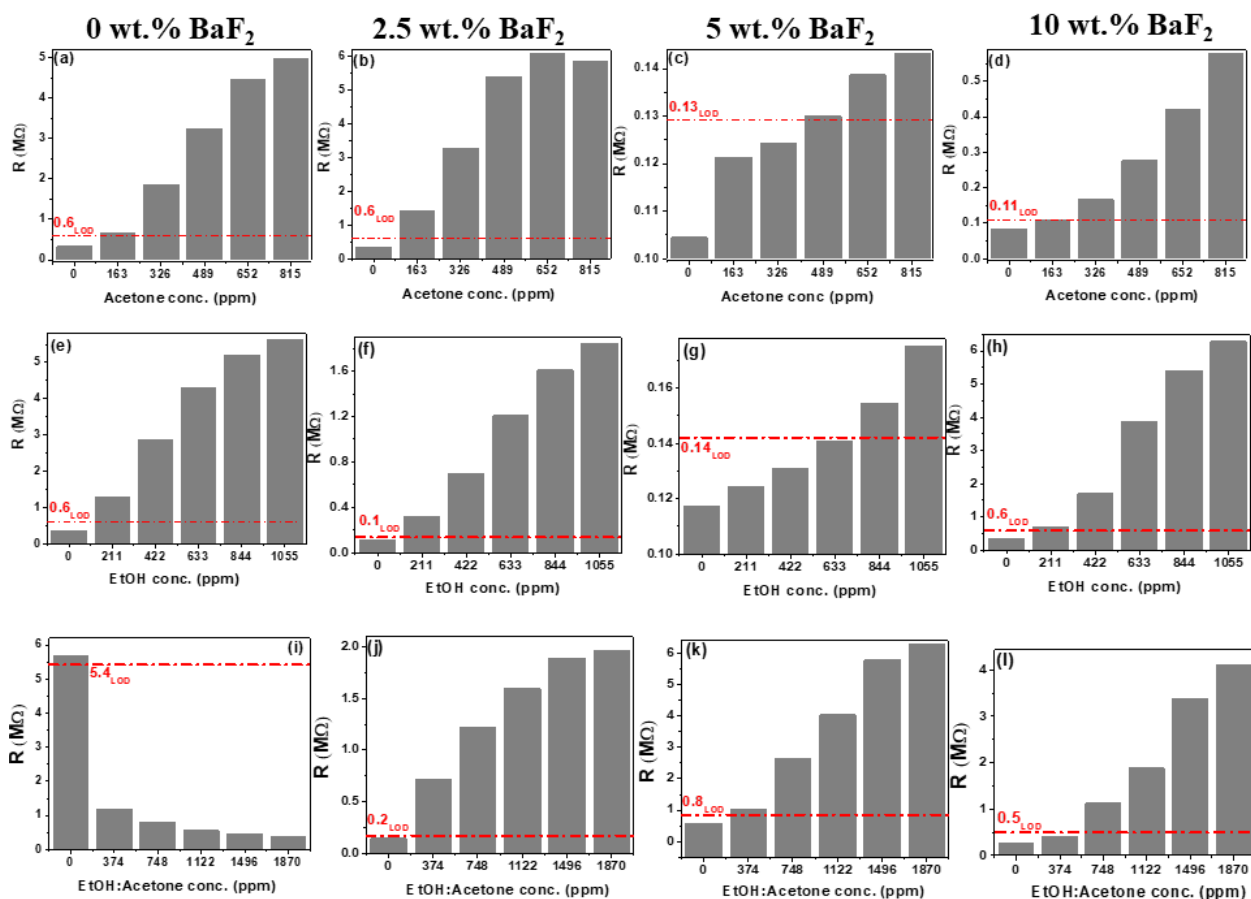

**Figure S3.** Sensor resistance as a function of analyte concentration for (a-d) acetone, (e-h) ethanol, and (i-l) ethanol: acetone; red line indicates the estimated  $LoD$  resistance of the corresponding sensor at the optimum frequency.

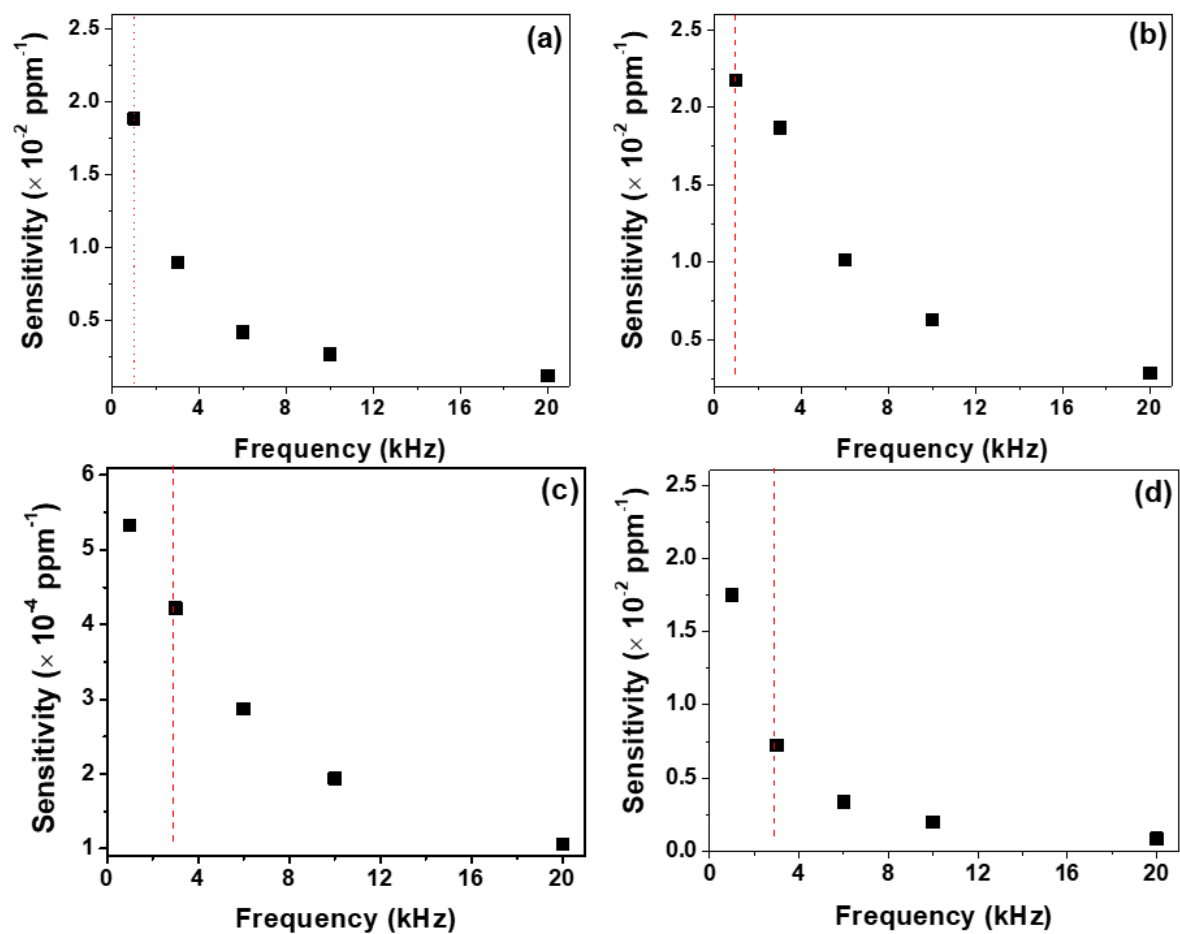

**Figure S4.** The sensitivities of sensors data based on hBN-BaF2 (a) 0 wt%, (b) 2.5 wt%, (c) 5 wt% and (d) 10 wt% for acetone as a function of frequency; dashed line indicates the optimum operating frequency.

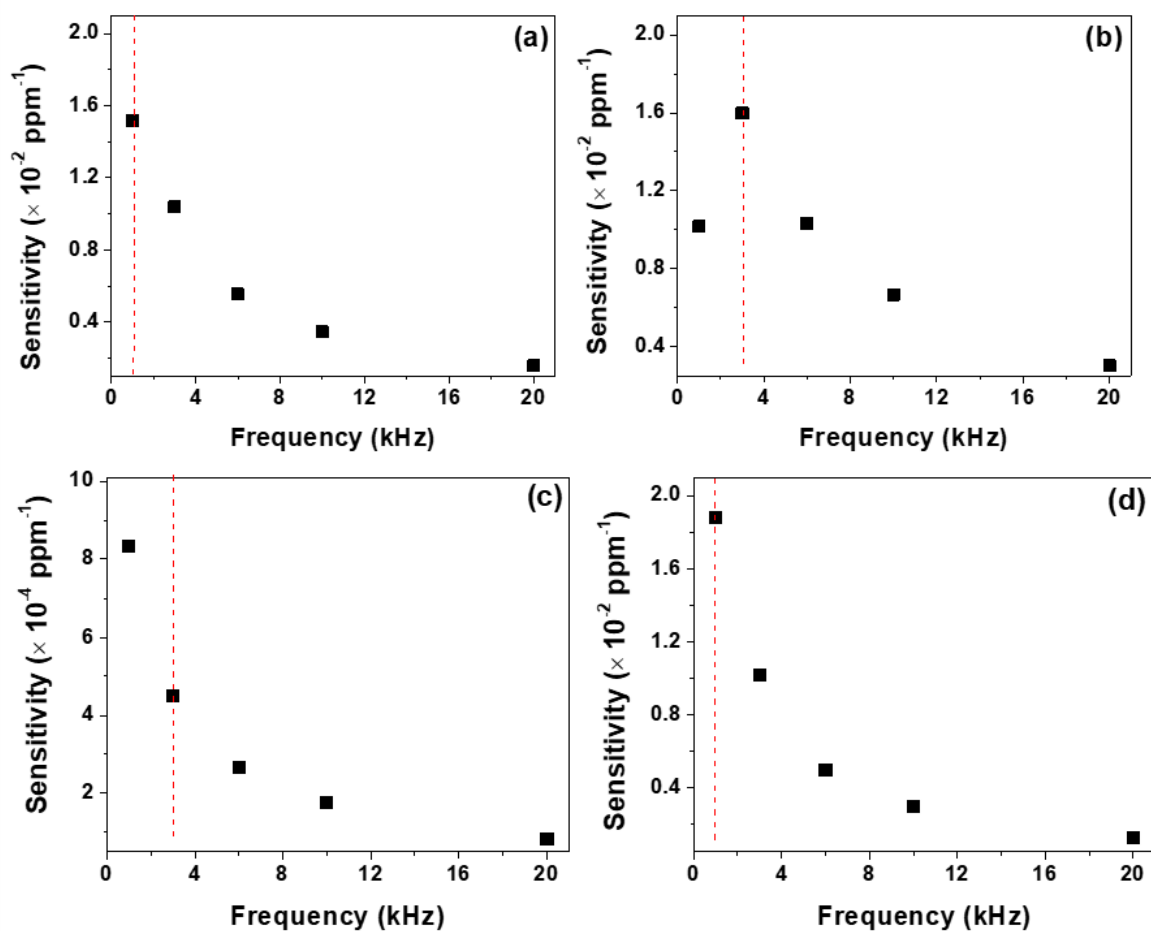

**Figure S5.** The sensitivities of sensors data based on hBN-BaF2 (a) 0 wt%, (b) 2.5 wt%, (c) 5 wt% and (d) 10 wt% for ethanol as a function of frequency; dashed line indicates the optimum operating frequency.

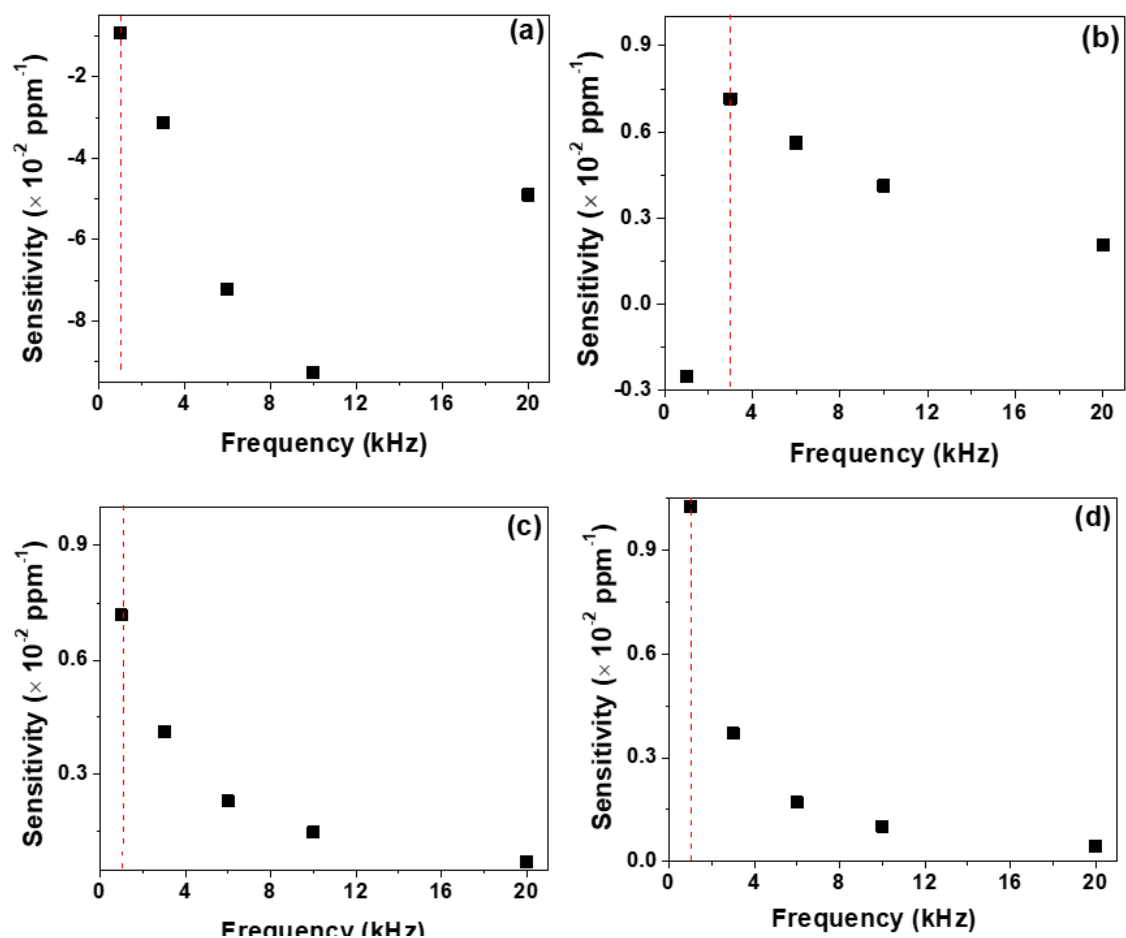

**Figure S6.** The sensitivities of sensors data based on hBN-BaF2 (a) 0 wt%, (b) 2.5 wt%, (c) 5 wt% and (d) 10 wt% for ethanol:acetone as a function of frequency; dashed line indicates the optimum operating frequency.

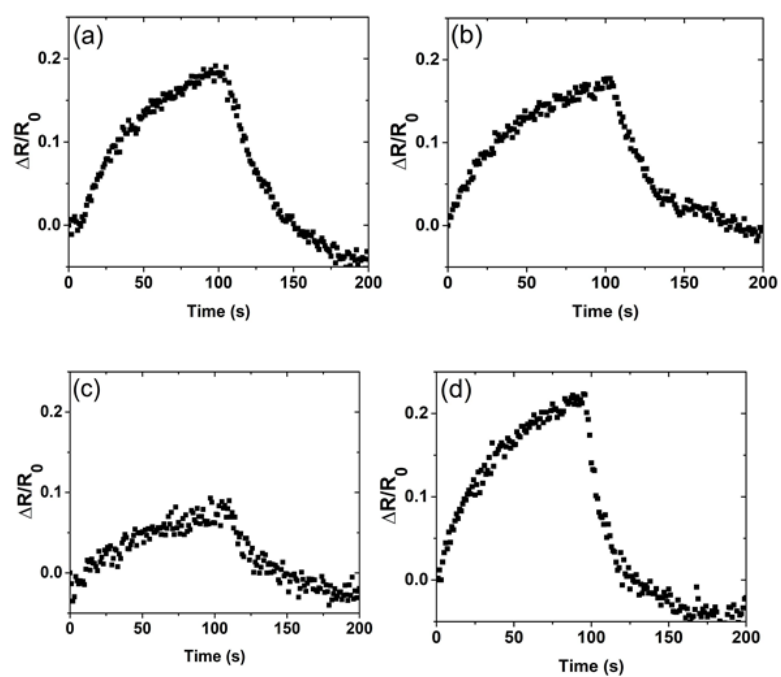

**Figure S7.** Responses and recovery times for (a) 0 wt%, (b) 2.5 wt%, (c) 5 wt% and (d) 10 wt% BaF<sub>2</sub>-modified *h*BN devices fabricated 18 months ago and after exposure and removal of 160 ppm of acetone at optimum operating frequencies.

**Table S1.** Properties of the studied analytes [6].

| Analyte | Nature of Solvent | Dielectric Constants ( $\epsilon$ ) | Dipole Moment (D) |
|---------|-------------------|-------------------------------------|-------------------|
| Acetone | Polar aprotic     | 20.7                                | 2.88              |
| Ethanol | Polar protic      | 24.3                                | 1.69              |

**Table S2.** Optimization parameters for the *h*BN sensors.

| Analyte | Parameter | 0 wt% | 2.5 wt% | 5 wt% | 10 wt% |
|---------|-----------|-------|---------|-------|--------|
| Acetone | $f$ (kHz) | 1     | 1       | 3     | 3      |
|         | LoQ (ppm) | 184   | 132     | -     | 239    |
| Ethanol | $f$ (kHz) | 1     | 3       | 3     | 1      |
|         | LoQ (ppm) | 135   | 92      | -     | 230    |

**Table S3.** Response and recovery times at 2 mg.mL<sup>-1</sup> concentration of the *h*BN dispersion.

| Analyte                | Samples | $t_{\text{resp}}$ (s) | $t_{\text{recov}}$ (s) |
|------------------------|---------|-----------------------|------------------------|
| Acetone                | 0 wt%   | 74                    | 95                     |
|                        | 2.5 wt% | 61                    | 71                     |
|                        | 5 wt%   | 36                    | 44                     |
|                        | 10 wt%  | 54                    | 50                     |
| Ethanol                | 0 wt%   | 79                    | 34                     |
|                        | 2.5 wt% | 77                    | 40                     |
|                        | 5 wt%   | 69                    | 34                     |
|                        | 10 wt%  | 71                    | 56                     |
| Acetone: Ethanol (1:1) | 0 wt%   | 78                    | 15                     |
|                        | 2.5 wt% | 113                   | 75                     |
|                        | 5 wt%   | 56                    | 15                     |
|                        | 10 wt%  | 102                   | 20                     |

**Table S4.** Reproducibility of the *h*BN sensors.

| Analyte | Parameter                                  | 0 wt% | 2.5 wt% | 5 wt% | 10 wt% |
|---------|--------------------------------------------|-------|---------|-------|--------|
| Acetone | $f$ (kHz)                                  | 1     | 1       | 3     | 1      |
|         | $S$ ( $\times 10^{-2}$ ppm <sup>-1</sup> ) | 0.04  | 0.1     | 0.04  | 0.12   |
|         | $f$ (kHz)                                  | 1     | 1       | 10    | 1      |



|                |                                          |     |     |      |     |
|----------------|------------------------------------------|-----|-----|------|-----|
| <b>Ethanol</b> | S ( $\times 10^{-2}$ ppm <sup>-1</sup> ) | 0.4 | 2.3 | 0.06 | 0.2 |
|----------------|------------------------------------------|-----|-----|------|-----|

## References

1. Feigelson, B. N., Frazier, R. M. & Twigg, M. III-Nitride crystal growth from nitride-salt solution. *J. Cryst. Growth* **2007**, 305, 399–402.
2. Bernard, S. and Miele, P. Polymer-derived boron nitride: A review on the chemistry, shaping and ceramic conversion of borazine derivatives. *Materials* **2014**, 7, 7436–7459.
3. Yuan, S.; Toury, B.; Benayoun, S; Chiriac, R.; Gombault, F.; Journet, C. and Brioude, A. Low-Temperature Synthesis of Highly Crystallized Hexagonal Boron Nitride Sheets with Li<sub>3</sub>N as Additive Agent. *Eur. J. Inorg. Chem.* **2014**, 32, 5507–5513.
4. Cunha, B. B.; Greenshields, M. W. C. C.; Mamo, M. A.; Coville, N. J. and Hümmelgen, I. A. A surfactant dispersed N-doped carbon sphere-poly(vinyl alcohol) composite as relative humidity sensor. *J. Mater. Sci. Mater. Electron.* **2015**, 26, 4198–4201.
5. Rodrigues, R.; Mamo, M. A.; Coville, N. J. and Hümmelgen, I. A. Hydrostatic pressure sensors based on carbon spheres dispersed in polyvinyl alcohol prepared using hexadecyltrimethylammonium bromide as surfactant and water as solvent. *Mater. Res. Express* **2014**, 1, 15605.
6. Dean, J. A. *Lange's handbook of chemistry*. In *Materials and Manufacturing Processes*. **1990**, 5, 687-688.
